# Supplementary material
Source: publisher site journal article supplement (https://www.dovepress.com/article/439737)
Supplement: Supplementary file 1 [file get_supplementary_file.php]

**General Information Questionnaire**

The social–demographic data collected from the caregivers and patients included age, gender, education level, marital status and medical payment method. In addition, clinical characteristics, such as stroke type and disease duration, were recorded.

**Medical payment methods：In China, different medical payment methods will affect the economic expenditure of families. Families of stroke survivors without medical insurance will face certain family economic burden, which will easily affect family resilience.**

**Disease duration：According to the previous literature review, due to the different duration of stroke survivors' disease, different stages of** **survivors's family experience, different degrees of adaptation, family resilience will be different.**

**Education level: The education level of caregivers is related to their acceptance of diseases, health education, rehabilitation guidance and other related knowledge. Family caregivers with higher education level have a relatively higher level of caring ability for survivors.**

**Family Resilience**

Family resilience was measured using the 54-item Family Resilience Assessment Scale (FRAS) developed by Chiu et al. [15]. The participants were asked to rate each item on a 4-point Likert scale, which included ‘strongly agree’, ‘agree’, ‘disagree’ and ‘strongly disagree’. The total score was the sum of the scores of all items and ranged from 54 to 216 points, with higher mean scores indicating higher levels of family resilience. The FRAS demonstrated satisfactory reliability and validity. Cronbach’s α of the whole scale is 0.96, and Cronbach’s α of the subscales ranges from a low of 0.68 to a high of 0.96. In the present study, Cronbach’s α was 0.872, with subscale reliability values ranging from 0.649 to 0.842 among stroke patients.

**Self-Efficacy**

The Self-Efficacy for Managing Chronic Disease 6-Item Scale (SECD-6) was developed in English by Lorig and colleagues in 2001 [16] to help assess patients’ confidence in managing fatigue, pain, emotional distress and other symptoms of a stroke. The researchers used the Chinese version of the SECD-6 to evaluate the SECD values of stroke patients in China. Items were scored on a 10-point Likert scale, ranging from ‘not at all confident’ to ‘totally confident’. The scale’s score was the mean of the six items, with a higher score indicating a higher level of self-efficacy. A score of >7 was defined as a high level of self-efficacy, a score of 4 was regarded as a low level of self-efficacy, and a score of 4–7 was regarded as a medium level of self-efficacy. This stratification facilitated the analysis of the degree of patients’ self-efficacy. The SECD-6 has well-documented psychometric properties [17]. The Cronbach’s α value for the present study was 0.91.

**Caregiver Burden Rating Scale**

The perceived burden of the caregivers of stroke patients in providing informal care was assessed using the Zarit Caregiver Burden Interview (ZBI) [18], which was translated into Chinese by Lie Wang in 2006 [19]. The ZBI, a self-reported instrument with two dimensions (personal burden and responsibility burden), measures a caregiver’s physical and emotional–physical states and social life, economic impacts and the relationship between the caregiver and the patient. It comprises 22 items graded on a scale from 0 (never) to 4 (nearly always), with higher scores indicating a higher burden. In this study, scores of <21 indicated no burden, 21–39 indicated a mild care burden, 40–59 indicated a moderate care burden, and >60 indicated a severe care burden. The reliability of the total ZBI was 0.87.

**Family Functioning Scale**

A 60-item self-reported questionnaire titled the Family Assessment Device (FAD) was used to evaluate family functioning [20]. The FAD–General Function (FAD–GF) subscale, which is part of the FAD and measures overall family functioning, was employed in the current study. Due to the GF subscale’s 12-item derivation from and significant correlation with the other six FAD subscales, it can be utilised as a condensed form of the FAD [21]. Positively- (e.g. ‘We confide in each other’) and negatively- (e.g. ‘We avoid discussing our fears and concerns’) worded sentences each made up six items. The FAD provided a subjective view of family functioning, with family members answering on a 4-point Likert scale from ‘strongly agree’ (1 point) to ‘strongly disagree’ (4 points). Scores of 2 and above denoted perceived unhealthy family functioning. The FAD–GF showed satisfactory reliability, with a Cronbach’s α of 0.71 in this study.

**Social Support Rating Scale**

The Social Support Rating Scale, developed by Xiao, was used to measure the social support of stroke patients and caregivers [22]. It included three dimensions (subjective support, objective support and support utilisation) and a total of 10 items. Answers to questions 1–4 and 8–10 received 1–4 points. For question 5, according to the support degree of options a–d, each option was counted as 1–4 points. The answers to questions 6 and 7 received 0–9 points, depending on the source of support. The final score was the sum of the 10 items. The level of social support was divided into three levels: 1) a score of <35 indicated a low level of social support, 2) a score of 35–45 represented a medium level of social support, and 3) a score of >45 represented a high level of social support. The scale has demonstrated impressive validity and reliability in the Chinese population [23, 24]. In this research, Cronbach's α was 0.818.

**Qualitative Research**

**Semi‐Structured Interview Framework**

The framework for the semi‐structured interview was formulated according to a literature review and the quantitative data of the informal caregivers of stroke patients; it included the following seven relevant questions:

1. Please describe the disease and medical care received by your family, including the length of the disease and duration of treatment, the impact of treatment, anticipated prognosis, etc.

2. How did you and your family respond when she/he had a stroke and required long-term care? How much of a care burden did you have? How did you adapt?

3. What challenges has your family faced up until now? How did you cope with them?

4. How did your family member’s illness affect your family? How have the relationships inside the family changed? What significant adjustments have you made in your family?

5. In addition to your family, relatives and friends, what kind of assistance has been given by medical personnel or social institutions?

6. Compared with other families, what advantages do you think your family has in coping with sudden illness events?

7. Who/what do you think has helped you the most? Do you have any other needs or expectations?
